# Supplementary figures and images for: Expression properties exhibit correlated patterns with the fate of duplicated genes, their divergence, and transcriptional plasticity in Saccharomycotina
Source: PubMed Central journal article supplement — DNA Res. 2017 Jun 15;24(6):559–70. doi: 10.1093/dnares/dsx025 (PMC5726480; doi:10.1093/dnares/dsx025), 2017-06-15

Figure S1.

(a)

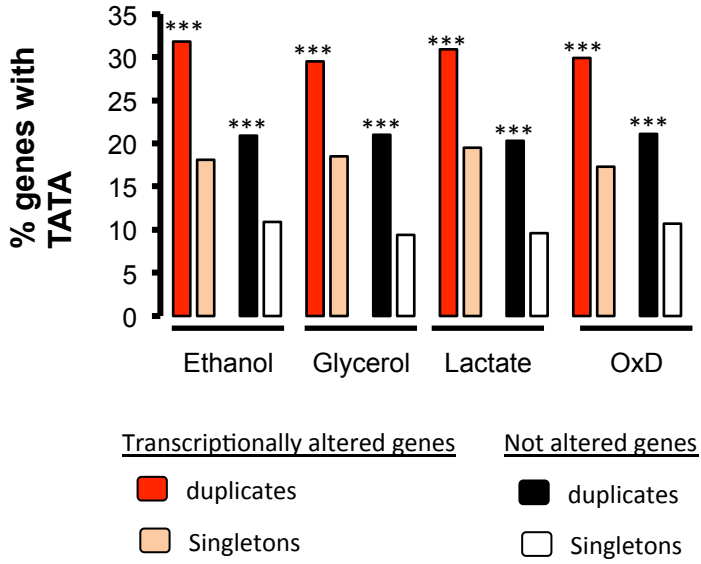

(b)

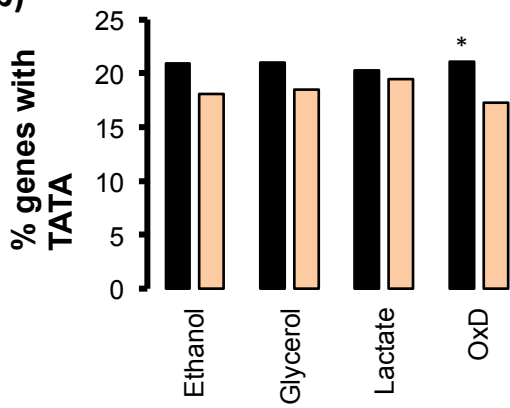

Supplement: figures1_dsx025.pdf [file figures1_dsx025.pdf]
